# Supplementary material
Source: PubMed Central journal article supplement (PMC5588098)
Supplement: ac7b01358_si_001.pdf [file ac7b01358_si_001.pdf]

# Supporting Information: An LC-MS/MS Based Method for the Quantification of Pyridox(am)ine 5'-Phosphate Oxidase Activity in Dried Blood Spots from Patients with Epilepsy

Matthew P. Wilson,<sup>1</sup> Emma J. Footitt,<sup>2</sup> Apostolos Papandreou,<sup>1</sup> Mari-Liis Uudelepp,<sup>1</sup> Ronit Pressler,<sup>3</sup> Danielle Stevenson,<sup>2</sup> Camila Gabriel,<sup>2</sup> Mel McSweeney,<sup>2</sup> Matthew Baggot,<sup>4</sup> Derek Burke,<sup>4</sup> Tommy Stödberg,<sup>5</sup> Kate Riney,<sup>6</sup> Manuel Schiff,<sup>7</sup> Simon J. H. Heales,<sup>1,4,8</sup> Kevin A. Mills,<sup>1</sup> Paul Gissen,<sup>1,2</sup> Peter T. Clayton,\*<sup>1</sup> Philippa B. Mills\*<sup>1</sup>

<sup>1</sup> Genetics and Genomic Medicine, UCL GOS Institute of Child Health, 30 Guilford St, London WC1N 1EH, UK.

<sup>2</sup> Metabolic Medicine Unit, Great Ormond Street Hospital for Children NHS Foundation Trust, London WC1N 3JH, UK.

<sup>3</sup> Neurology Department, Great Ormond Street Hospital for Children NHS Foundation Trust, London WC1N 3JH, UK.

<sup>4</sup> Chemical Pathology, Great Ormond Street Hospital for Children NHS Foundation Trust, London WC1N 3JH, UK.

<sup>5</sup> Neuropediatric Unit, Karolinska University Hospital, SE-171 76, Stockholm, Sweden.

<sup>6</sup> Neurosciences Unit, The Lady Cilento Children's Hospital, 501 Stanley Street, South Brisbane 4101, QLD, Australia.

<sup>7</sup> Reference Center for Inborn Errors of Metabolism, Robert Debré University Hospital, APHP, Paris 75019, France.

<sup>8</sup> Neurometabolic Unit, National Hospital for Neurology and Neurosurgery, Queen Square, London WC1N 3BG.

Corresponding Authors:

\* E-mail: peter.clayton@ucl.ac.uk (Peter T. Clayton)

\* E-mail: p.mills@ucl.ac.uk (Philippa B. Mills)

## CONTENTS:

Table S-1: Profile for reversed-phase gradient elution of B<sub>6</sub> vitamers.....Page S-2

Table S-2: MS Parameters for MRM-Based Quantification of the B<sub>6</sub> vitamers. ....Page S-3

Table S-3: Effect of pH on PNPO Activity .....Page S-4

Table S-4: Effect of exogenous PLP on PNPO activity.....Page S-4

Table S-5: Summary of subjects with mutations identified in PNPO.....Page S-5

Figure S-1: LC-MS/MS chromatogram of the B<sub>6</sub> vitamers and pyridoxic acid.....Page S-7

Figure S-2: Effect of buffer upon pyridoxal formation due to PLP hydrolysis.....Page S-8

Figure S-3: Effect of incubation buffer on pyridoxal kinase activity.....Page S-9

Figure S-4: Effect of substrate concentration on PNPO activity.....Page S-10

Figure S-5: Effect of FMN concentration and substrate on PLP formation.....Page S-11

Figure S-6: PNPO activity as a function of DBS weight.....Page S-12

Figure S-7: PNPO activity as a function of PLP formation from 0-120 min.....Page S-13

**Table S-1: Profile for Reversed-Phase Gradient Elution of B<sub>6</sub> vitamers.**

| Time (min) | Percent mobile phase |      | Flow rate (ml/min) |
|------------|----------------------|------|--------------------|
|            | A                    | B    |                    |
| 0.00       | 97.5                 | 2.5  | 0.40               |
| 0.40       | 97.5                 | 2.5  | 0.40               |
| 3.75       | 50.0                 | 50.0 | 0.40               |
| 4.25       | 0.1                  | 99.9 | 0.40               |
| 5.00       | 97.5                 | 2.5  | 0.40               |
| 6.50       | 97.5                 | 2.5  | 0.40               |

**Table S-2: MS Parameters for MRM-Based Quantification of the B<sub>6</sub> Vitamers.**

| Analyte                                | Retention time (minutes) | Precursor ion (m/z) | Product ion (m/z) | Cone voltage (V) | Collision energy (V) |
|----------------------------------------|--------------------------|---------------------|-------------------|------------------|----------------------|
| Pyridoxamine 5'-phosphate              | 0.64                     | 249.04              | 134.05            | 27               | 22                   |
| Pyridoxal 5'-phosphate                 | 0.84                     | 248.00              | 150.01            | 27               | 16                   |
| Pyridoxine 5'-phosphate                | 0.84                     | 250.16              | 134.13            | 58               | 20                   |
| d <sub>3</sub> -Pyridoxal 5'-phosphate | 0.84                     | 251.16              | 152.18            | 30               | 18                   |
| Pyridoxic acid                         | 0.92                     | 184.06              | 147.99            | 18               | 18                   |
| d <sub>2</sub> -Pyridoxic acid         | 0.92                     | 186.06              | 149.99            | 18               | 18                   |
| Pyridoxal                              | 1.08                     | 168.1               | 150.1             | 21               | 12                   |
| d <sub>3</sub> -Pyridoxal              | 1.08                     | 171.1               | 153.1             | 21               | 12                   |
| Pyridoxamine                           | 1.17                     | 169.12              | 134.04            | 22               | 20                   |
| d <sub>3</sub> -Pyridoxamine           | 1.17                     | 172.12              | 137.04            | 22               | 20                   |
| Pyridoxine                             | 1.42                     | 170.1               | 134.0             | 27               | 19                   |
| d <sub>2</sub> -Pyridoxine             | 1.42                     | 172.1               | 136.0             | 27               | 19                   |

**Table S-3: Effect of pH on PNPO Activity**

| pH  | PNPO Activity<br>(pmol DBS <sup>-1</sup> h <sup>-1</sup> ) |
|-----|------------------------------------------------------------|
| 7.0 | 16.72 ±0.80                                                |
| 7.2 | 20.37 ±0.36                                                |
| 7.4 | 18.43 ±0.98                                                |
| 7.6 | 19.88 ±1.06                                                |
| 7.8 | 24.90 ±1.32                                                |
| 8.0 | 22.72 ±1.78                                                |

PNPO activity measured in a healthy adult control at pH 7 - 8. Incubation conditions: 20 mmol/L KPO<sub>4</sub> (pH adjusted appropriately); 1.5 μmol/L FMN; 400 nmol/L PNP; 37 °C; 300 rpm agitation; 1 x 3 mm DBS; 30 min incubation; n = 3. Error = SEM.

**Table S-4: Effect of Exogenous PLP on PNPO Activity.**

| PLP added to reaction<br>buffer (nmol/L) | % activity* |
|------------------------------------------|-------------|
| 0                                        | 100.0       |
| 25                                       | 101.5       |
| 50                                       | 95.8        |
| 100                                      | 76.5        |
| 150                                      | 79.1        |
| 200                                      | 58.7        |

PNPO activity measured in a healthy adult control with varying amounts of PLP added to the reaction buffer. \*100% = Activity with no exogenous PLP. Incubation conditions: 20 mmol/L TrisPO<sub>4</sub> pH 7.6; 1.5 μmol/L FMN; 400 nmol/L PNP; 37 °C; 300 rpm agitation; 1 x 3 mm DBS; 30 min incubation. (n=1).

**Table S-5: Summary of Subjects with Mutations Identified in PNPO.**

| Subject | Age at sampling | Seizure Onset | Mutation/sequence variant                        | Presumed effect                           | PNPO activity (pmol DBS <sup>-1</sup> h <sup>-1</sup> ) | PM/PA ratio | References                                |
|---------|-----------------|---------------|--------------------------------------------------|-------------------------------------------|---------------------------------------------------------|-------------|-------------------------------------------|
| 1       | 2y              | 5d            | c.[98A>T] (M) + c.[576C>A] (P)                   | p.D33V (M) + Y157* (P)                    | 0.00                                                    | 0.45        | Novel                                     |
| 2       | 1d              | None *        | c.[364-1G>C] + [364-1G>C]                        | Splice errors + Splice errors             | 0.65                                                    | 0.13        | Novel                                     |
| 3       | 9y              | 5m            | c.[347G>A] + c.[347G>A]                          | p.R116Q + p.R116Q                         | 0.00                                                    | 0.00        | Mills et al. 2014                         |
| 4       | 5y              | None ***      | c.[347G>A] + c.[347G>A]                          | p.R116Q + p.R116Q                         | 0.13                                                    | 0.00        | Novel                                     |
| 5       | 25y             | 3h            | c.[264-21_264-1delinsC] (M)<br>+ c.[98A>T] (P)   | Splice errors (M)<br>+ p.D33V (P)         | 1.96                                                    | 0.10        | Mills et al. 2014                         |
| 6       | 7y              | 5h            | c.[641dupA] + ? **                               | p.Q214fs + ? **                           | 0.00                                                    | 0.16        | Mills et al. 2014;<br>Raimondi et al 2015 |
| 7       | 6y              | 30 min        | c.[284G>A] (M) +<br>c.[148G>A]; c.[364-1G>A] (P) | p.R95H (M) +<br>p.E50K; Splice errors (P) | 0.47                                                    | 0.44        | Mills et al. 2014                         |
| 8       | 16y             | n/a           | c.[363+5G>A] + c.[363+5G>A]                      | Splice errors + Splice errors             | 1.83                                                    | 0.01        | Novel                                     |
| 9       | 17y             | n/a           | c.[363+5G>A] + c.[363+5G>A]                      | Splice errors + Splice errors             | 1.77                                                    | 0.00        | Novel                                     |
| 10      | 12y             | 10h           | c.[347G>A];c.[674G>A]<br>+ c.[347G>A];c.[674G>A] | p.R116Q;p.R225H<br>+ p.R116Q;p.R225H      | 0.00                                                    | 0.55        | Mills et al. 2014                         |

|    |     |                           |                                                        |                                                |      |      |                                         |
|----|-----|---------------------------|--------------------------------------------------------|------------------------------------------------|------|------|-----------------------------------------|
| 11 | 13y | <12h                      | c.[148G>A]; c.[364-1G>A]<br>+ c.[148G>A]; c.[364-1G>A] | p.E50K;Splice errors<br>+ p.E50K;Splice errors | 3.11 | 0.39 | Mills et al. 2005                       |
| 12 | 5m  | n/a                       | c.[673C>T] + c.[673C>T]                                | p.R225C + p.R225C                              | 0.00 | 0.24 | Novel                                   |
| 13 | 3y  | n/a                       | c.[347G>A] + c.[347G>A]                                | p.R116Q + p.R116Q                              | 0.00 | 0.00 | Novel                                   |
| 14 | 5y  | 90 min                    | c.[637C>T] + c.[637C>T]                                | p.P213S + p.P213S                              | 2.32 | 0.74 | Mills et al. 2014;<br>Hatch et al. 2015 |
| 15 | 3y  | No neonatal<br>seizures * | c.[637C>T] + c.[637C>T]                                | p.P213S + p.P213S                              | 4.67 | 0.70 | Mills et al. 2014;<br>Hatch et al. 2015 |
| 16 | 11m | 3w                        | c.[194G>T] + c.[194G>T]                                | p.W65L + p.W65L                                | 0.00 | 0.11 | Novel                                   |
| 17 | 6y  | 6h                        | c.[98A>T] + c.[98A>T]                                  | p.D33V + p.D33V                                | 0.04 | 0.95 | Mills et al. 2014                       |
| 18 | 4y  | n/a                       | c.[263+2T>C] + c.[263+2T>C]                            | Splice errors + Splice Errors                  | 3.58 | 0.13 | Novel                                   |

Control ranges; Children receiving B<sub>6</sub> supplementation: 23.0 – 85.9 pmol DBS<sup>-1</sup> h<sup>-1</sup> (n=16); Children not receiving B<sub>6</sub> supplementation: 10.0 – 95.0 pmol DBS<sup>-1</sup> h<sup>-1</sup> (n=37); Healthy adults: 13.8 - 44.0 pmol DBS<sup>-1</sup> h<sup>-1</sup> (n=7).

\*No seizures due to prophylactic treatment – in infancy/childhood presented with two seizures due to late PLP doses (first at 10m).

\*\*No second mutation found.

\*\*\* Mother recipient of multivitamin containing pyridoxine during pregnancy.

n/a = not available; d = day; m = month; y = year

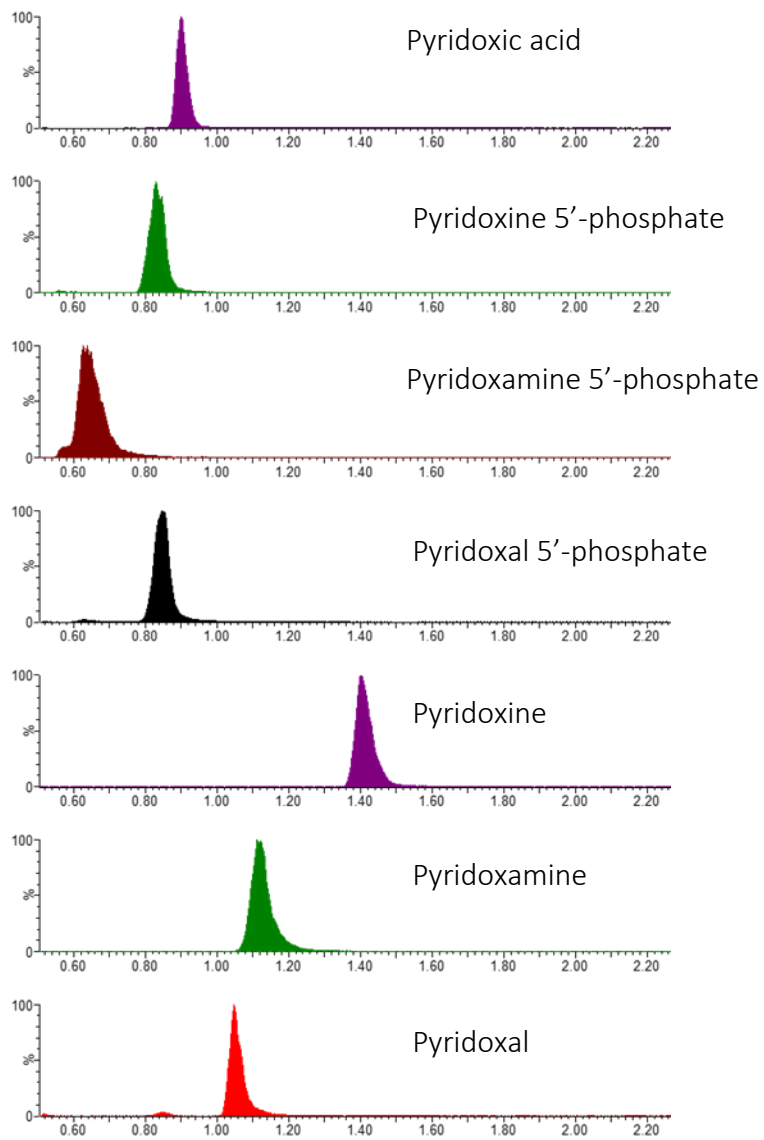

**Figure S-1:** LC-MS/MS chromatogram showing the elution profile of the B<sub>6</sub> vitamers and pyridoxic acid.

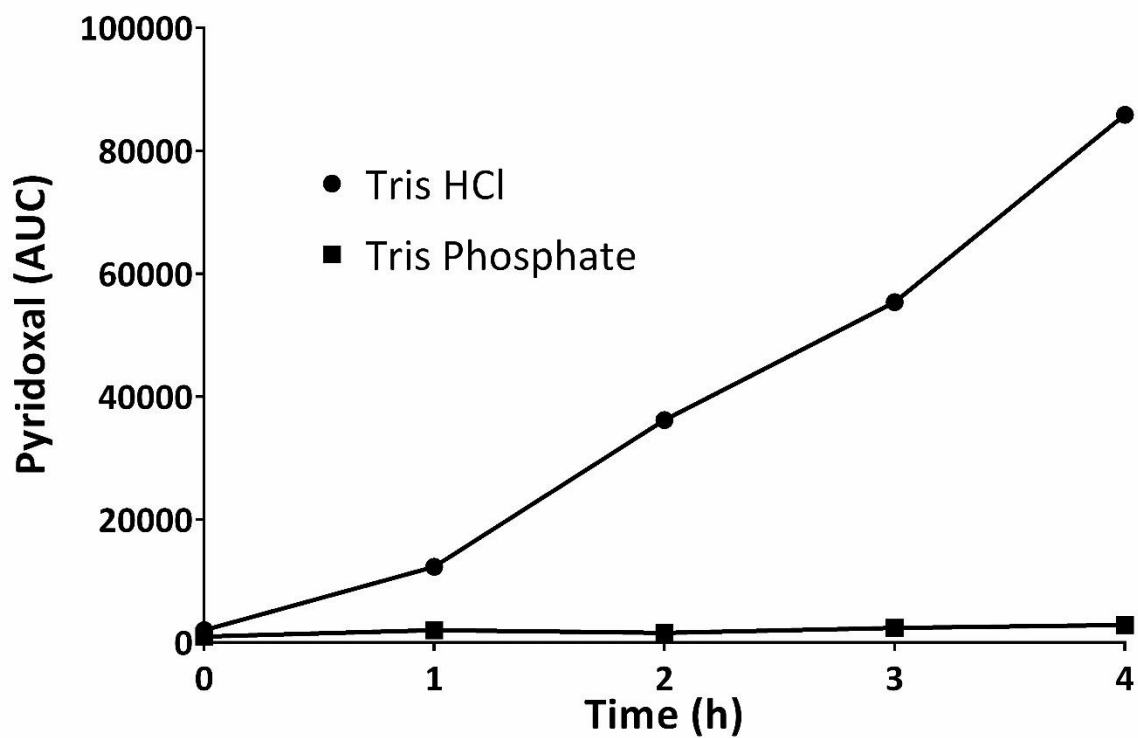

**Figure S-2:** Effect of buffer on pyridoxal formation. Incubation conditions: 20 mmol/L TrisPO<sub>4</sub>/Cl pH 7.6; 1.5 μmol/L FMN; 400 nmol/L PNP; 37 °C; 300 rpm agitation; 1 x 3 mm DBS. DBS from a healthy adult control. AUC = area under curve. (n=1).



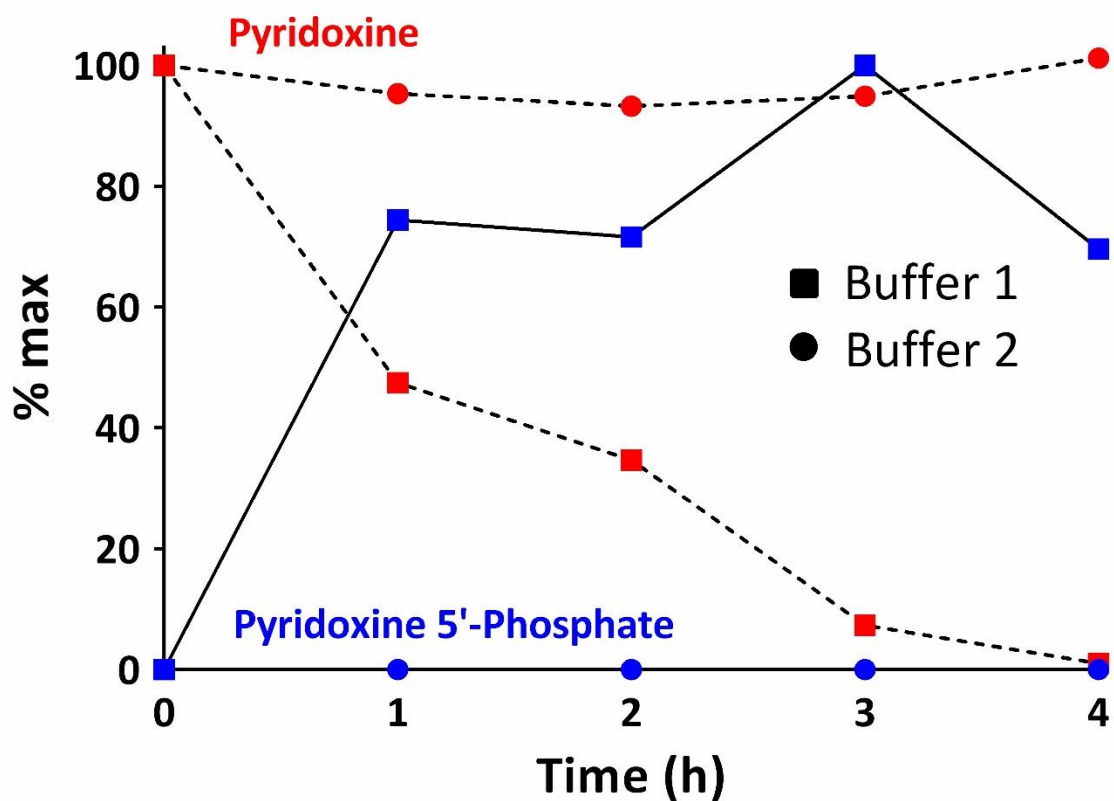

**Figure S-3:** Effect of incubation buffer on pyridoxal kinase activity. % maximum concentrations at specific time points (0-4 h) Filled line = PNP; dashed line = PN. **Buffer 1 includes cofactor reported to be necessary for optimal pyridoxal kinase activity:** 20 mmol/L KCl pH 7.6; 1.5  $\mu$ mol/L FMN; 0.3 mmol/L ATP; 3 mmol/L MgCl<sub>2</sub>; 400 nmol/L PN; 37 °C; 300 rpm agitation. **Buffer 2 lacks PK cofactors:** 20 mmol/L KCl pH 7.6; 1.5  $\mu$ M FMN; 400 nmol/L PN; 37 °C; 300 rpm agitation. (n=1).

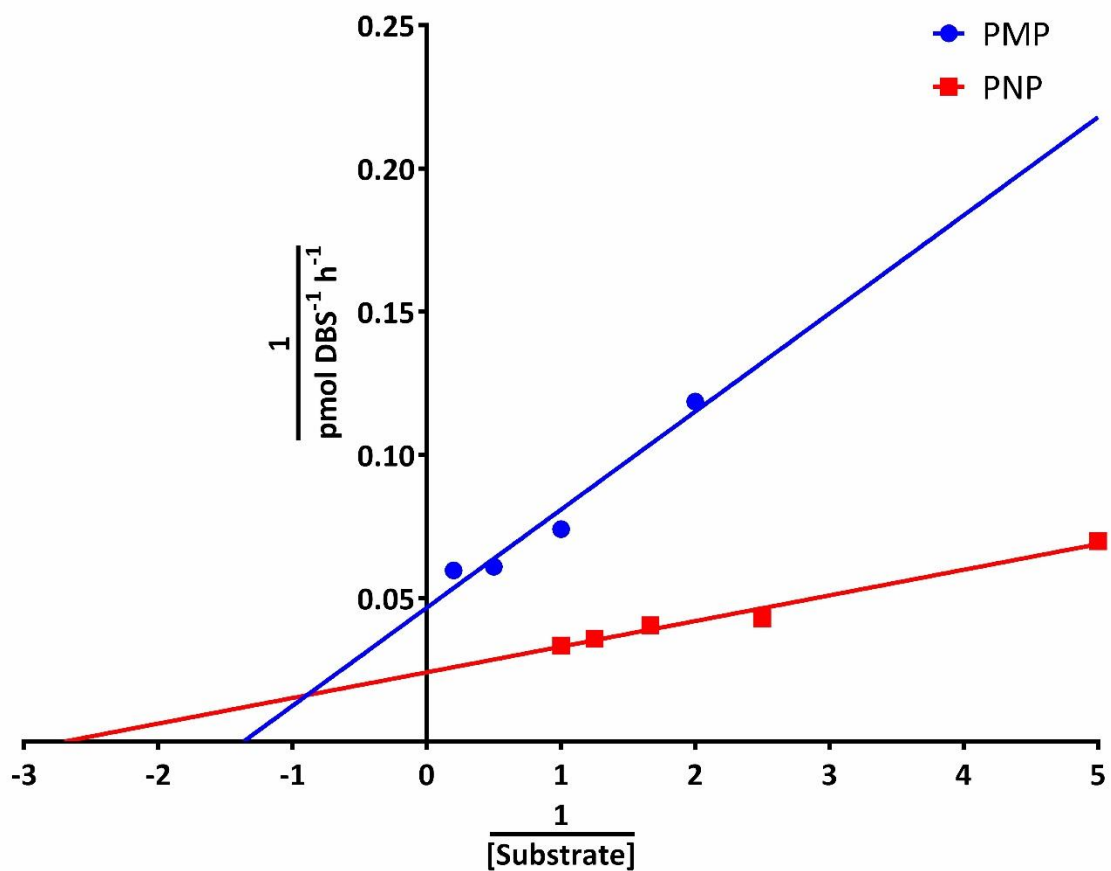

**Figure S-4:** Lineweaver-Burk plot showing the effect of substrate concentration and type on PLP formation. Incubation conditions: 20 mmol/L TrisPO<sub>4</sub> pH 7.6; 1.5 μmol/L FMN; 0 - 1 μmol/L PNP or 0 - 5 μmol/L PMP; 37 °C; 300 rpm agitation; 1 x 3 mm DBS from a healthy adult control. Calculated V<sub>max</sub>: PNP 39.55 ± 3.55 pmol DBS<sup>-1</sup> h<sup>-1</sup>; PMP 19.76 ± 1.42 pmol DBS<sup>-1</sup> h<sup>-1</sup>. Calculated K<sub>m</sub>: PNP 0.319 ± 0.081 μmol/L; PMP 0.530 ± 0.143 μmol/L. Michaelis-Menten kinetics calculated using GraphPad Prism 6.05.

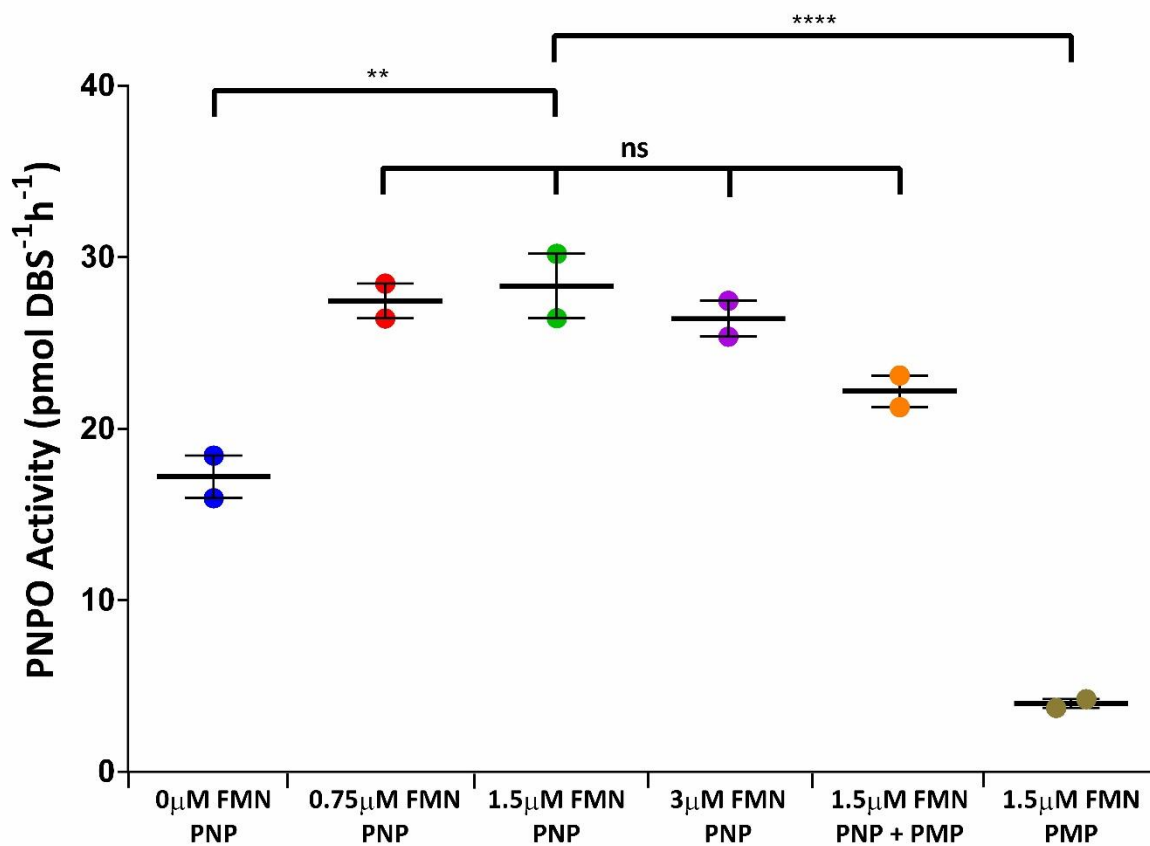

**Figure S-5:** Effect of FMN concentration and substrate on PLP formation. Incubation conditions as follows: 20 mmol/L TrisPO<sub>4</sub> pH 7.6; 400nmol/L PNP and/or PMP; 37 °C; 300 rpm agitation; 30 min incubation; 1 x 3 mm DBS. Error bars = SEM. Statistical analysis was performed using one-way ANOVA followed by Tukey's multiple comparisons test: ns = not significant; \*\* = P<0.01; \*\*\*\* = P<0.0001. (n=2).

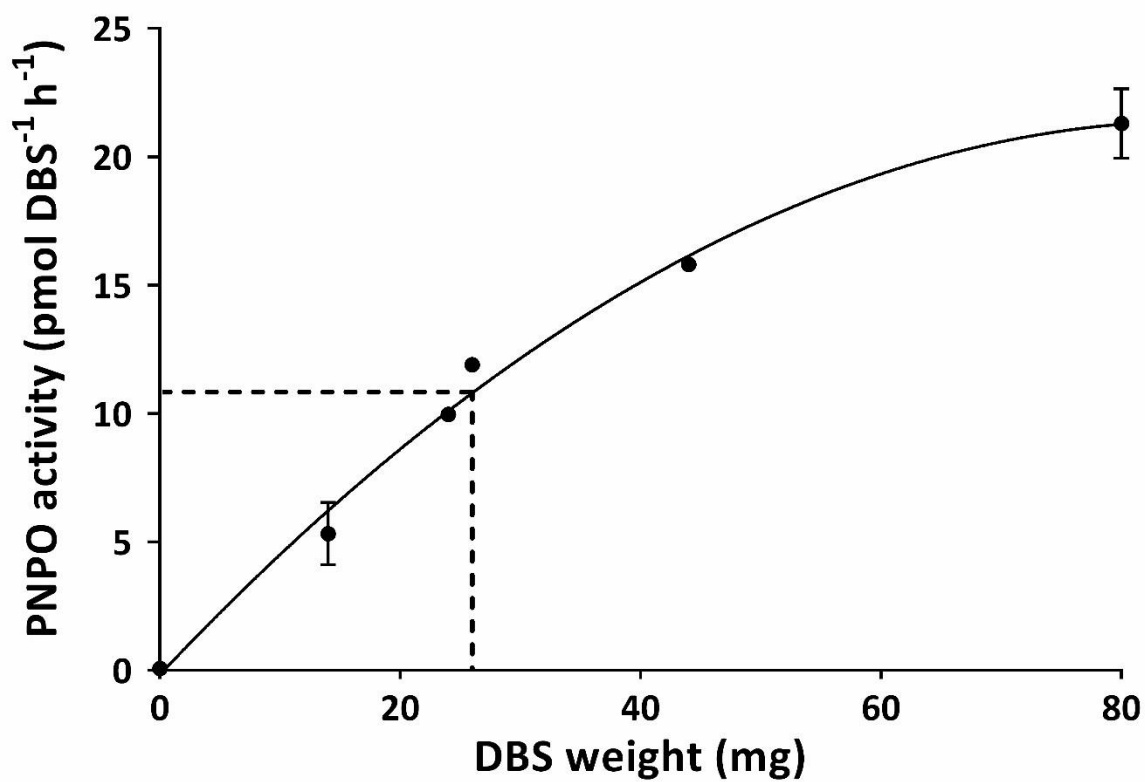

**Figure S-6:** The effect of DBS weight on PNPO activity. Data point at 0 mg corresponds to a 3mm punch containing no blood. Unbroken line is a second order polynomial best-fit of the data shown. Dashed line corresponds to the approximate weight of a 3mm punch filled with dried blood (26 mg). Incubation conditions: 20 mmol/L TrisPO<sub>4</sub> pH 7.6; 1.5  $\mu$ mol/L FMN; 400 nmol/L PNP; 37 °C; 300 rpm agitation; 30 min incubation. Error bars = SEM (n=2).

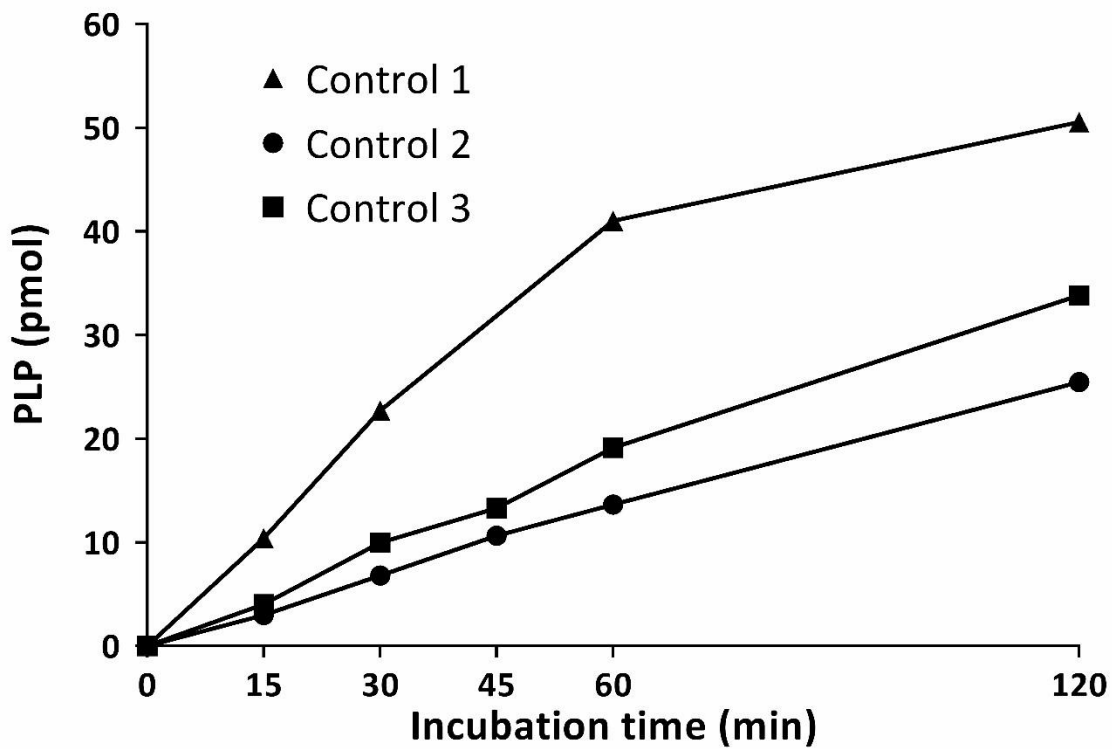

**Figure S-7:** PNPO activity as a function of PLP formation from 0-120 min. Control 1; Child hospital control (7 m); Control 2; Healthy male adult control (33 y); Control 3; Healthy female adult control (45 y). Incubation conditions: 20 mmol/L TrisPO<sub>4</sub> pH 7.6; 1.5 μmol/L FMN; 400 nmol/L PNP; 37 °C; 300 rpm agitation; 1 x 3 mm DBS. Each data point represents n=1.
